# Supplementary material for: Nucleolin Aptamer N6L Reprograms the Translational Machinery and Acts Synergistically with mTORi to Inhibit Pancreatic Cancer Proliferation
Source: MDPI journal article supplement (doi:10.3390/cancers13194957), 2021-10-01

Supplementary figure S1

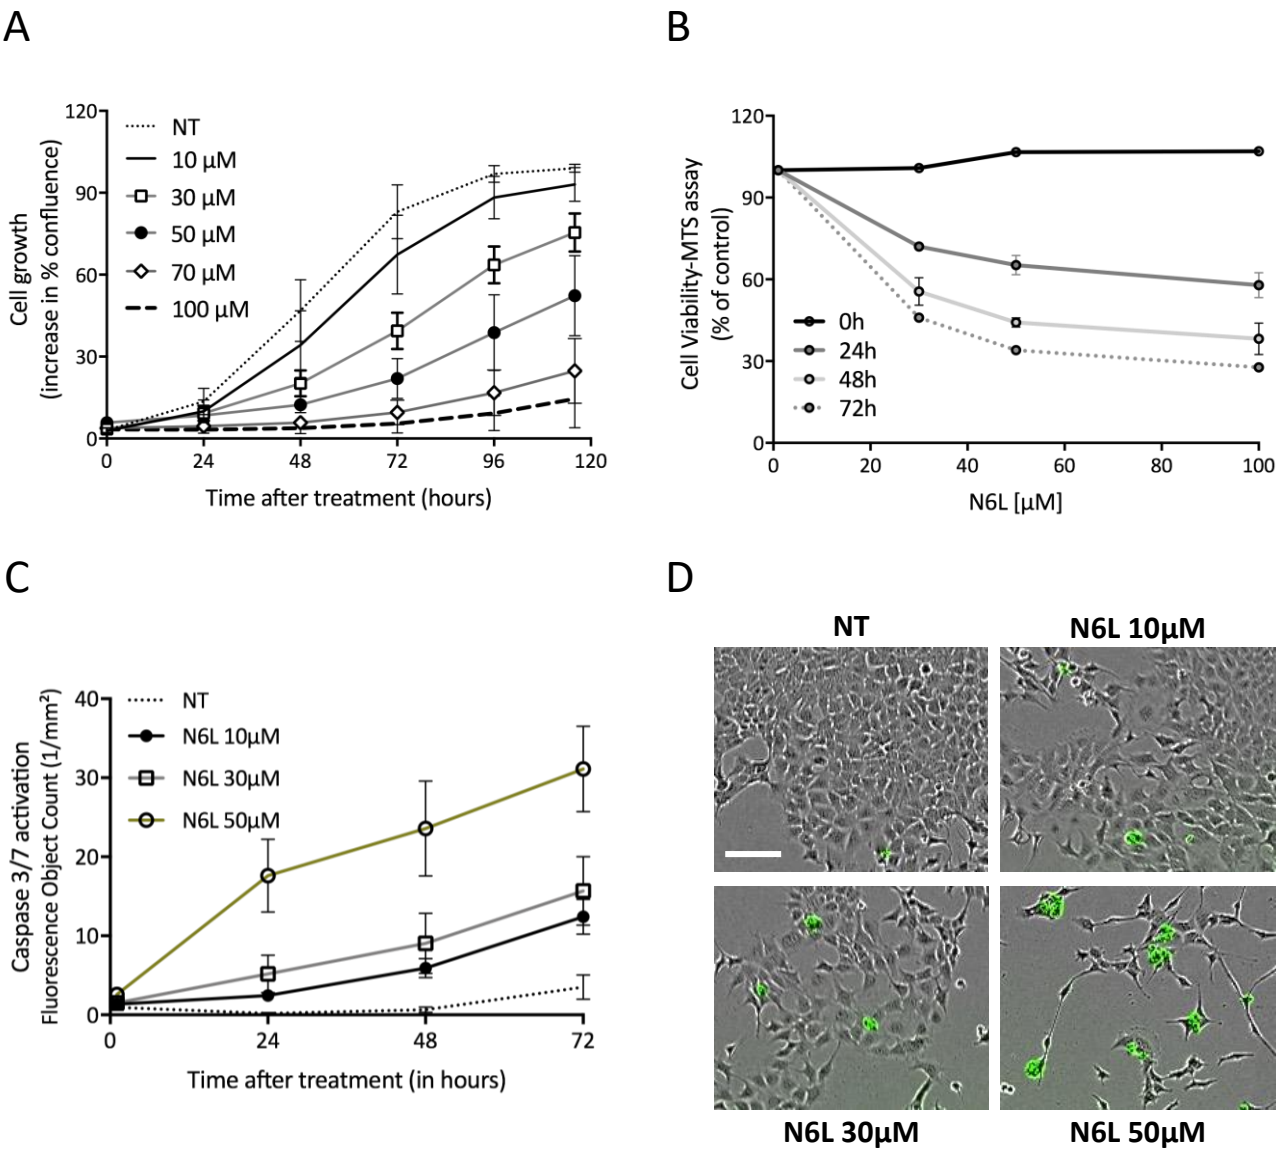

# B

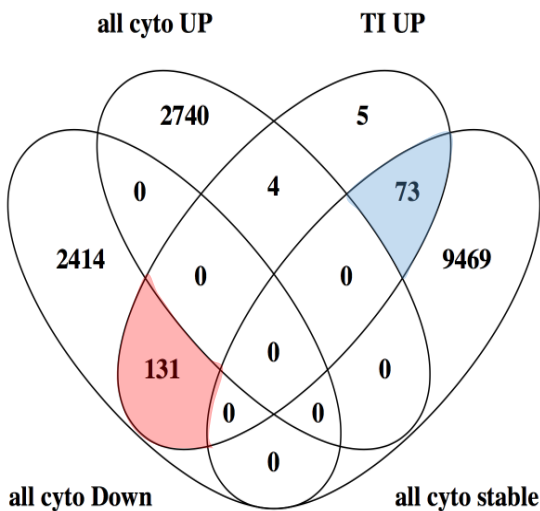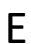

TI UP/Cyto Down (n=131)

| Index | Name                                                                                               | P-value     | Adjusted p-value | Odds Ratio | Combined score |
|-------|----------------------------------------------------------------------------------------------------|-------------|------------------|------------|----------------|
| 1     | Translation                                                                                        | 1.882e-11   | 1.421e-8         | 13.25      | 327.10         |
| 2     | Cytoplasmic ribosomal proteins                                                                     | 2.143e-9    | 0.000001079      | 14.25      | 284.35         |
| 3     | Mitochondrial protein import                                                                       | 0.000001070 | 0.0002020        | 17.75      | 244.05         |
| 4     | Influenza viral RNA transcription and replication                                                  | 8.943e-9    | 0.000003376      | 12.31      | 228.09         |
| 5     | Activation of mRNA upon binding of the cap-binding complex and eIFs, and subsequent binding to 43S | 0.000001857 | 0.0003116        | 16.19      | 213.71         |

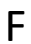

**TI UP/Cyto stable (n=73)**

| Index | Name                                                  | P-value   | Adjusted p-value | Odds Ratio | Combined score |
|-------|-------------------------------------------------------|-----------|------------------|------------|----------------|
| 1     | regulation of cholesterol storage (GO:0010885)        | 0.0008470 | 1.000            | 45.66      | 323.01         |
| 2     | cellular response to nitrogen starvation (GO:0006995) | 0.0009986 | 1.000            | 42.15      | 291.22         |
| 3     | cellular response to nitrogen levels (GO:0043562)     | 0.0009986 | 1.000            | 42.15      | 291.22         |
| 4     | positive regulation of lipid storage (GO:0010884)     | 0.002158  | 1.000            | 28.84      | 177.03         |
| 5     | peroxisomal membrane transport (GO:0015919)           | 0.02170   | 1.000            | 45.66      | 174.90         |

Supplementary data S3

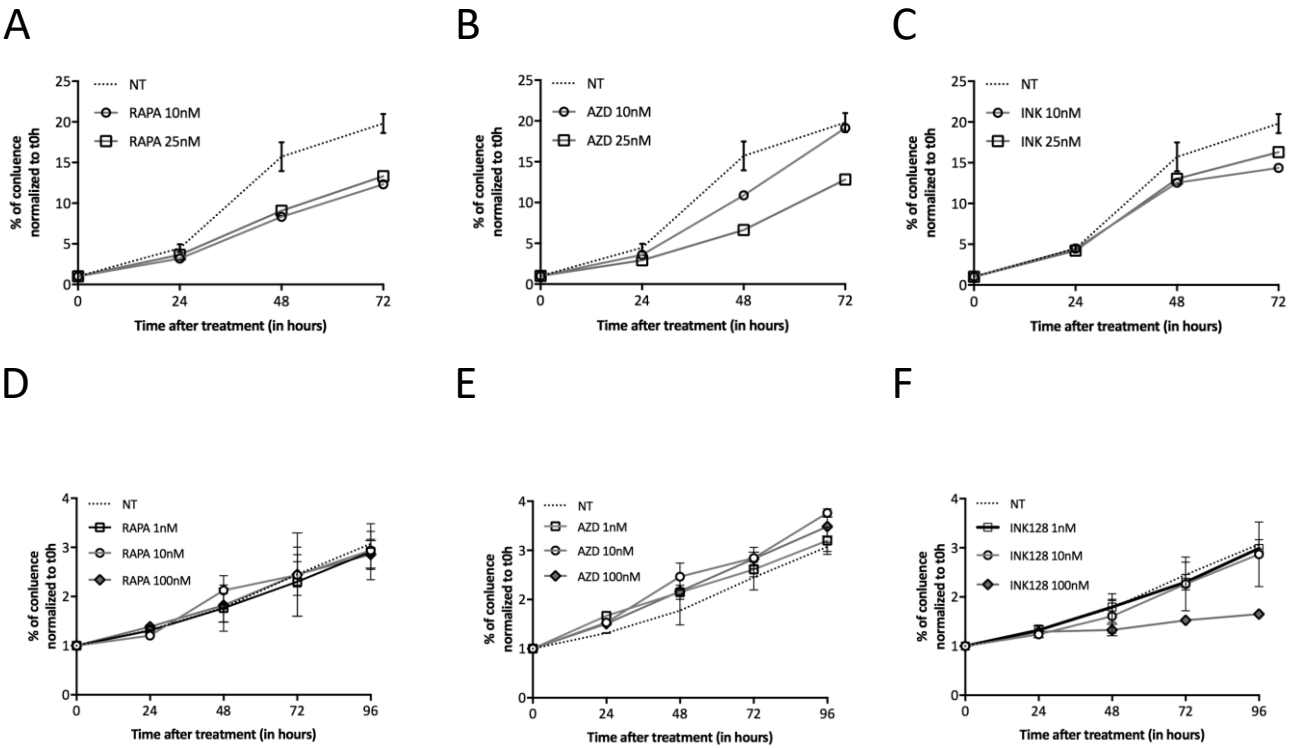

Supplementary data S4

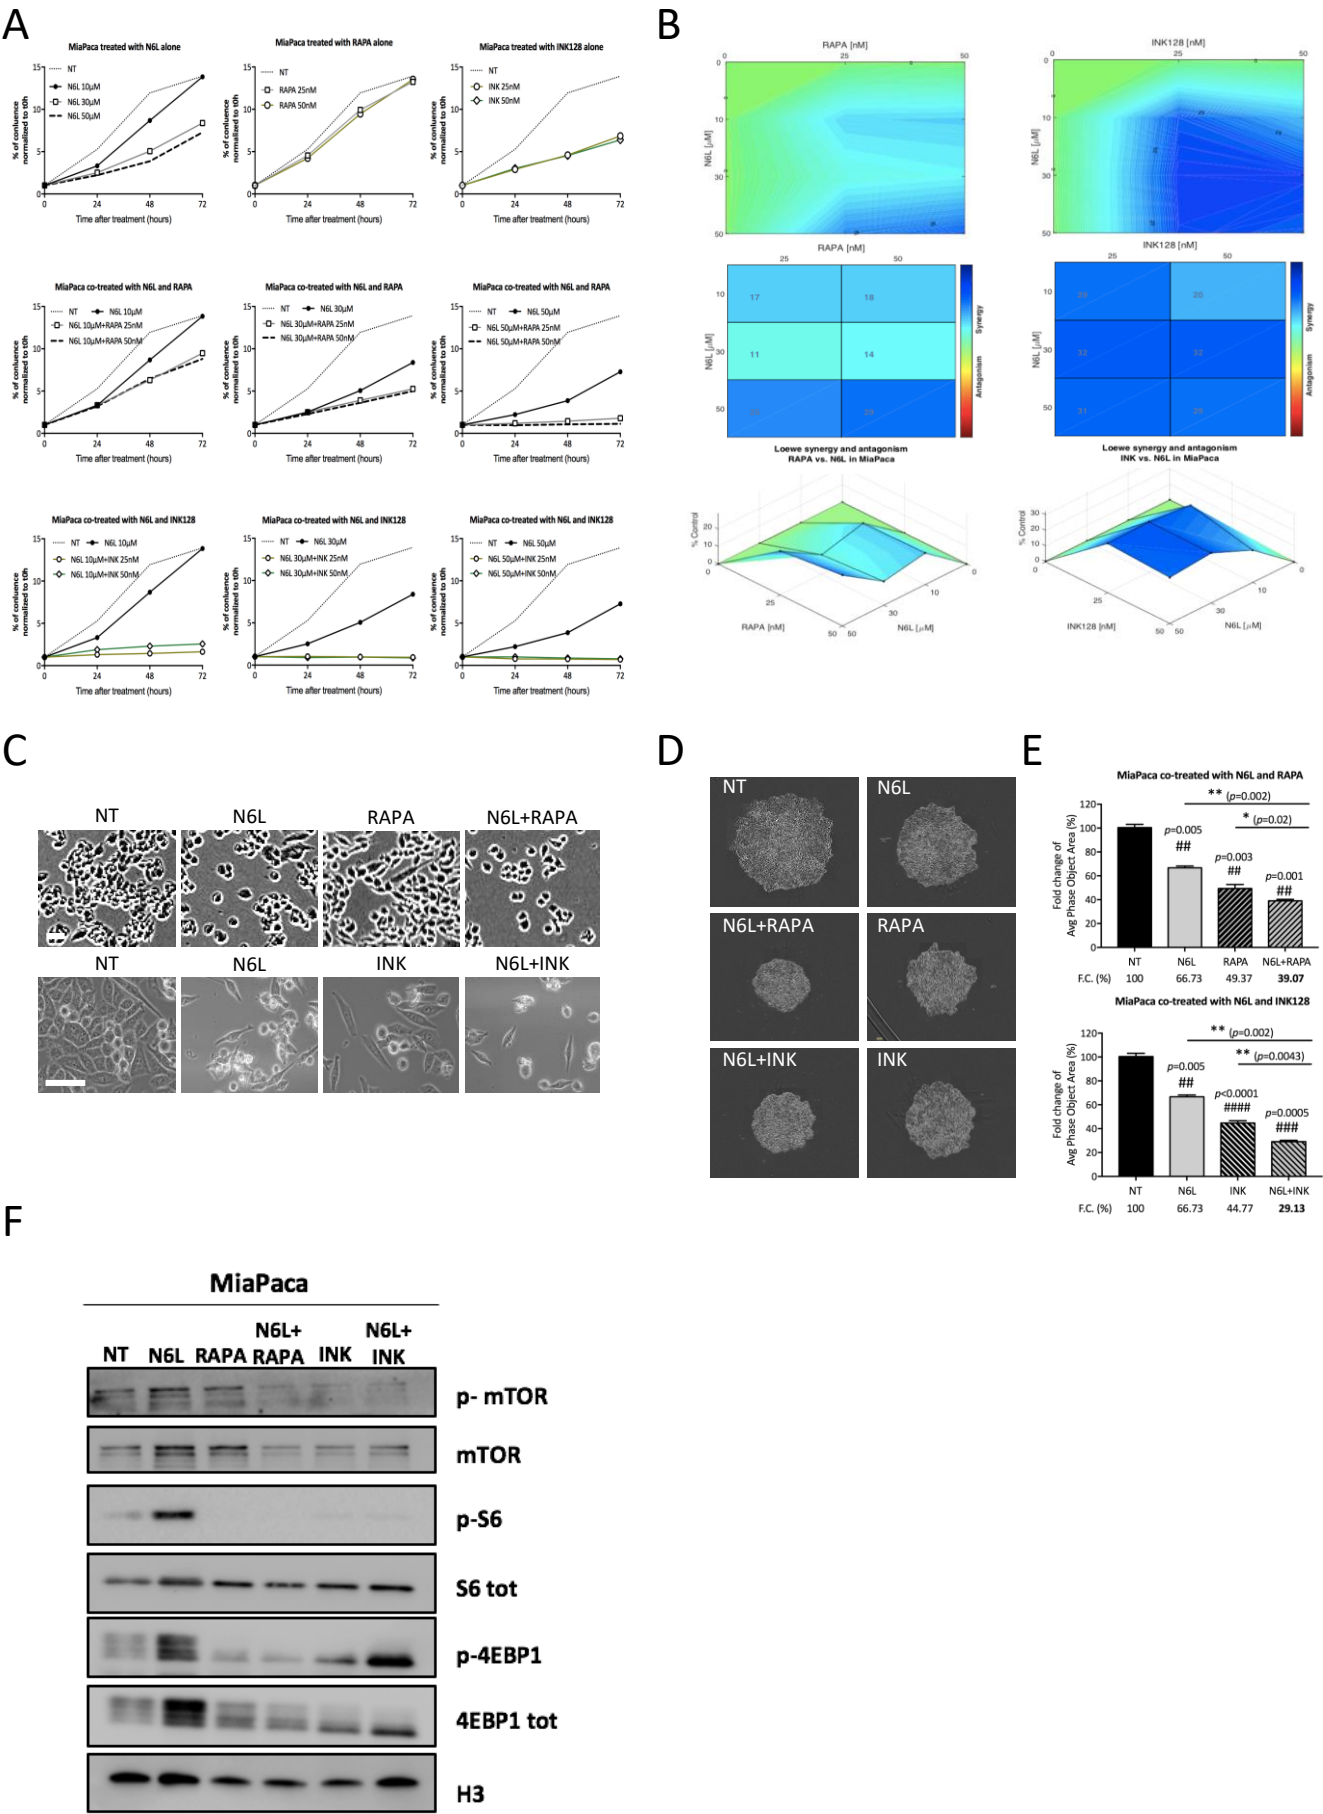

Supplementary data S5

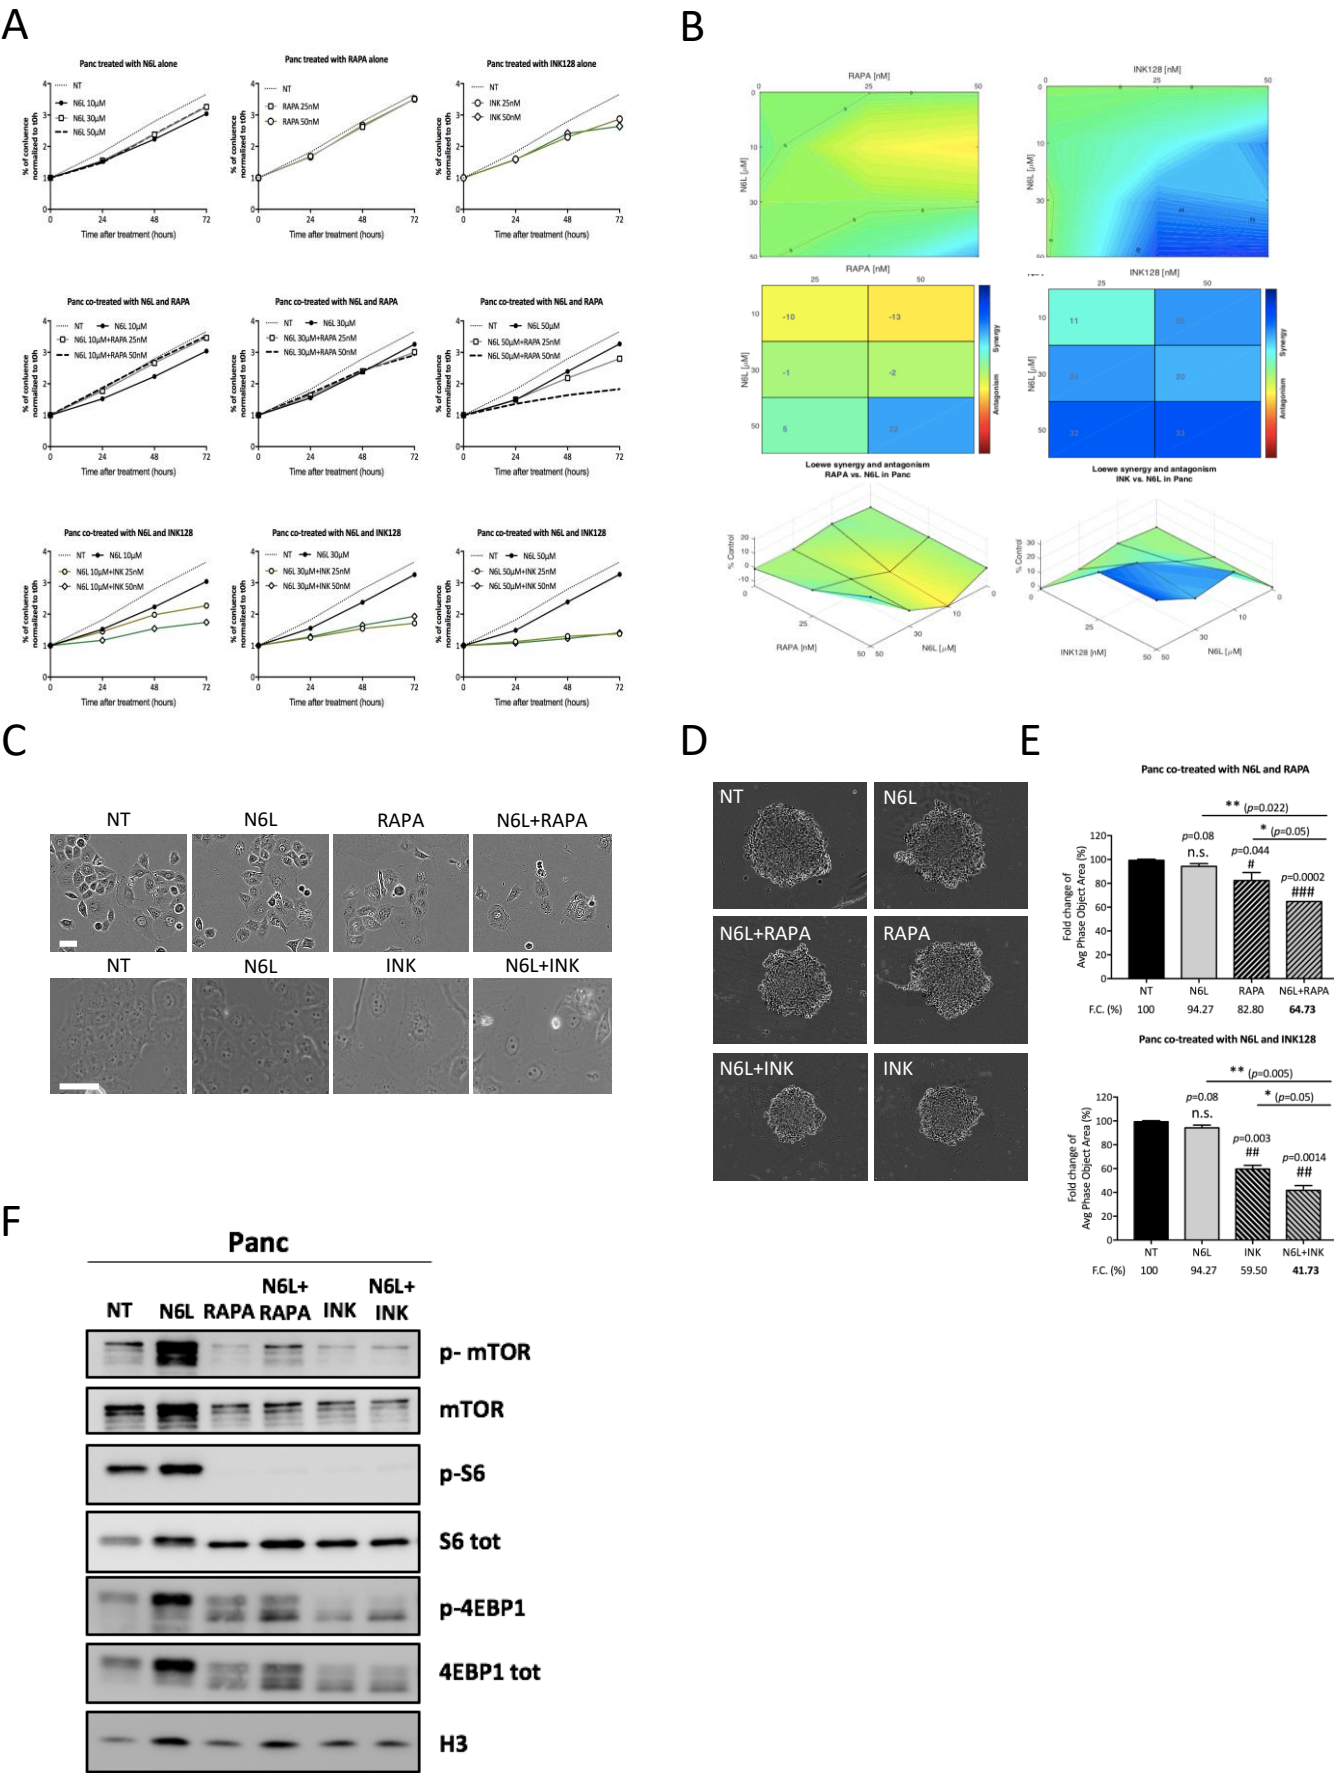



## Supplementary Figure S6

A-uncropped WB for Fig 1D

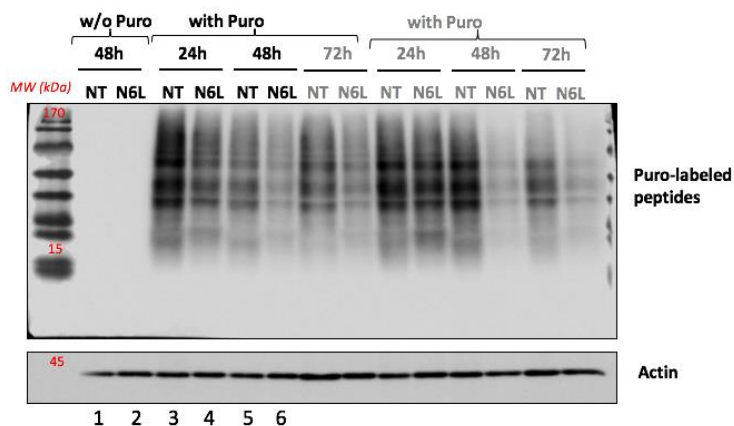

B- uncropped WB for Fig 3B-D

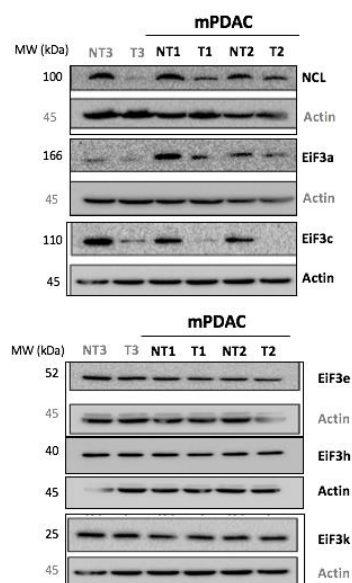

C- uncropped WB for Fig 4D

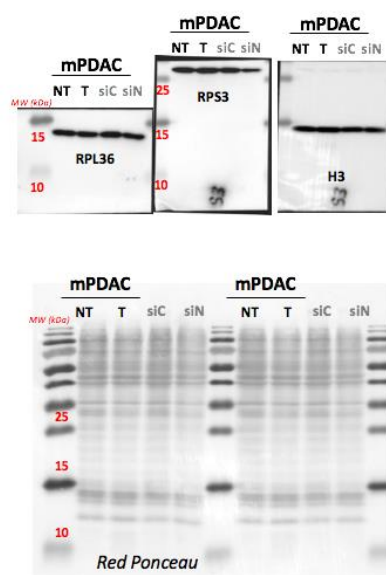

D- uncropped WB for Fig 5D

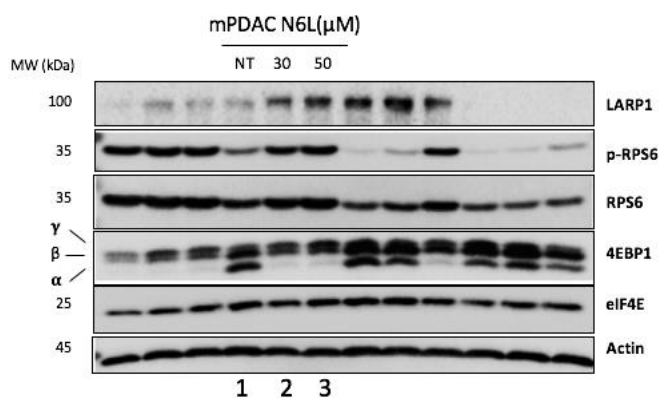

E-uncropped WB for Fig 7A

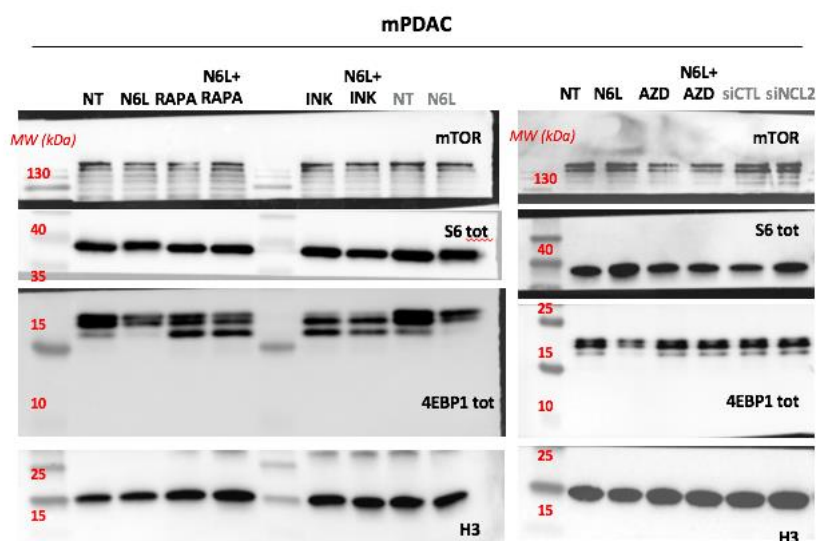

Supplementary Figure S6

F-uncropped WB for Fig 7B

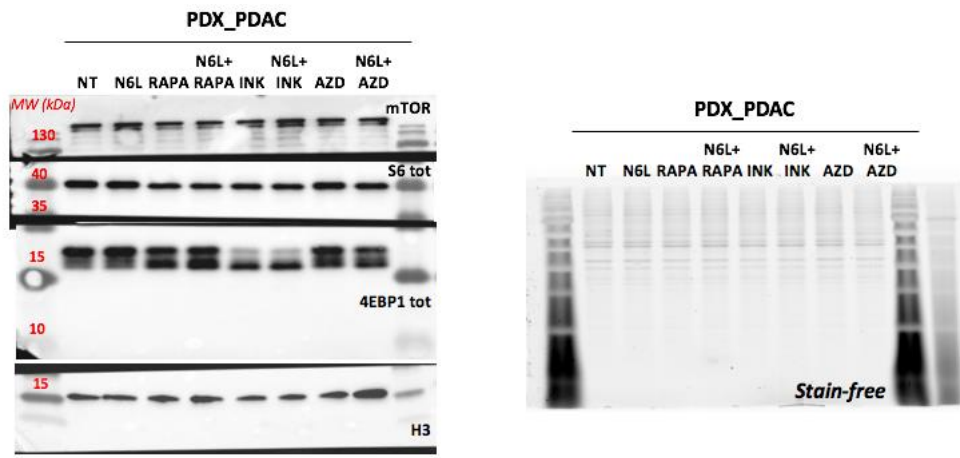

G-uncropped WB for Fig S4F & S5F

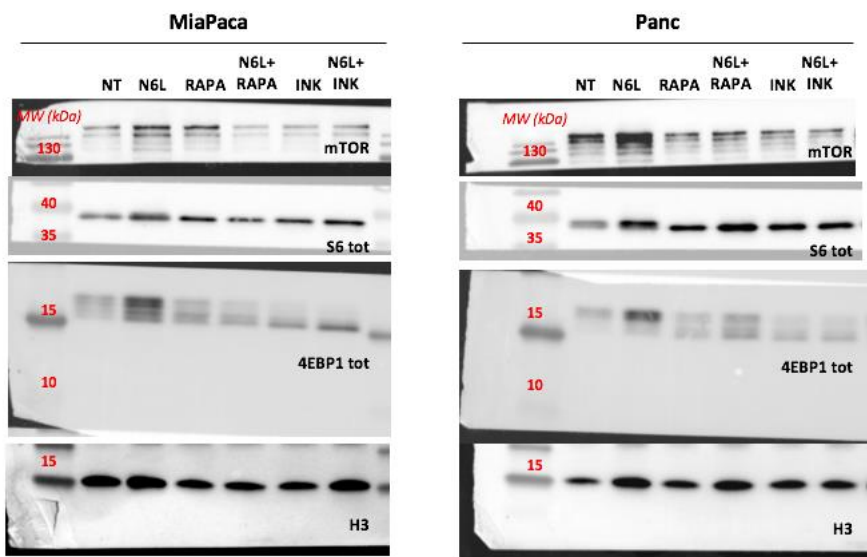

Supplement: s1 [file s1]
