# Supplementary material for: Nucleolin Aptamer N6L Reprograms the Translational Machinery and Acts Synergistically with mTORi to Inhibit Pancreatic Cancer Proliferation
Source: MDPI journal article supplement (doi:10.3390/cancers13194957), 2021-10-01
Supplement: s1 [file s1]

Supplementary table S2

| Primary antibodies   | Dilution | References                        |
|----------------------|----------|-----------------------------------|
| Nucleolin            | 1:1000   | #22758; Abcam                     |
| Puromycin (12D10)    | 1:2000   | #MABE343; EMD Millipore           |
| Actin                | 1:5000   | #A2228; Sigma-Aldrich             |
| Histone H3           | 1:3000   | #1791; Abcam                      |
| RPS6                 | 1:1000   | #2317; Cell Signaling Technology  |
| Phospho-RPS6         | 1:1000   | #2211; Cell Signaling Technology  |
| mTOR                 | 1:1000   | #2972; Cell Signaling Technology  |
| Phospho-mTOR         | 1:1000   | #2971; Cell Signaling Technology  |
| Pan-AKT              | 1:1000   | #9272; Cell Signaling Technology  |
| Phospho-AKT          | 1:500    | #9271; Cell Signaling Technology  |
| 4EBP1                | 1:1000   | #9644; Cell Signaling Technology  |
| Phospho-4EBP1        | 1:1000   | #2855; Cell Signaling Technology  |
| LARP1                | 1:1000   | #14763; Cell Signaling Technology |
| EiF4E                | 1:1000   | #9742; Cell Signaling Technology  |
| EiF3a                | 1:1000   | #NBP1-18891,NovusBio              |
| EiF3c                | 1:1000   | #A300-377A ; Bethyl               |
| EiF3e                | 1:1000   | #ab36766 ; Abcam                  |
| EiF3h                | 1:1000   | #A301-754A ; Bethyl               |
| EiF3k                | 1:1000   | #NB100-93304. NovusBio            |
| RPS3                 | 1:500    | #A303-840A ; Bethyl               |
| RPL36A               | 1:500    | #ab241584 ; Abcam                 |
| Secondary antibodies | Dilution | References                        |
| Anti-rabbit IgG      | 1:10000  | #7074; Cell Signaling Technology  |
| Anti-mouse IgG       | 1:20000  | #7076; Cell Signaling Technology  |
